# Supplementary material for: Climate records in ancient Chinese diaries and their application in historical climate reconstruction – A case study of Yunshan Diary
Source: Copernicus journal article supplement (doi:10.5194/cp-2020-72), 2020-05-20
Supplement: Supplementary file [file cp-2020-72-AC1-supplement.pdf]

## **References about the phenology (corresponding to comment 6)**

Jeanneret François and Rutishauser This, Seasonality as a Core Business of Phenology, in: Phenological Research: Methods for Environmental and Climate Change Analysis, edited by Hudson IL and Keatley MR, Springer, Dordrech, Netherlands, 2010.

Leith H: Phenology and seasonal modeling, Springer-Verlag, New York, USA, 1974.

van Vliet AJH and De Groot RS: “Challenging times” in the context of the European phenology network, in: Challenging times: towards an operational system for monitoring, modeling, and forecasting of phenological changes and their socio-economic impacts, edited by van Vliet AJH, Wageningen University, Wageningen, Netherlands, 2003.
